# Supplementary material for: Comparative genomics of actinomycetes with a focus on natural product biosynthetic genes
Source: PubMed Central journal article supplement (PMC3848822; doi:10.1186/1471-2164-14-611), 2013-09-11

0.01

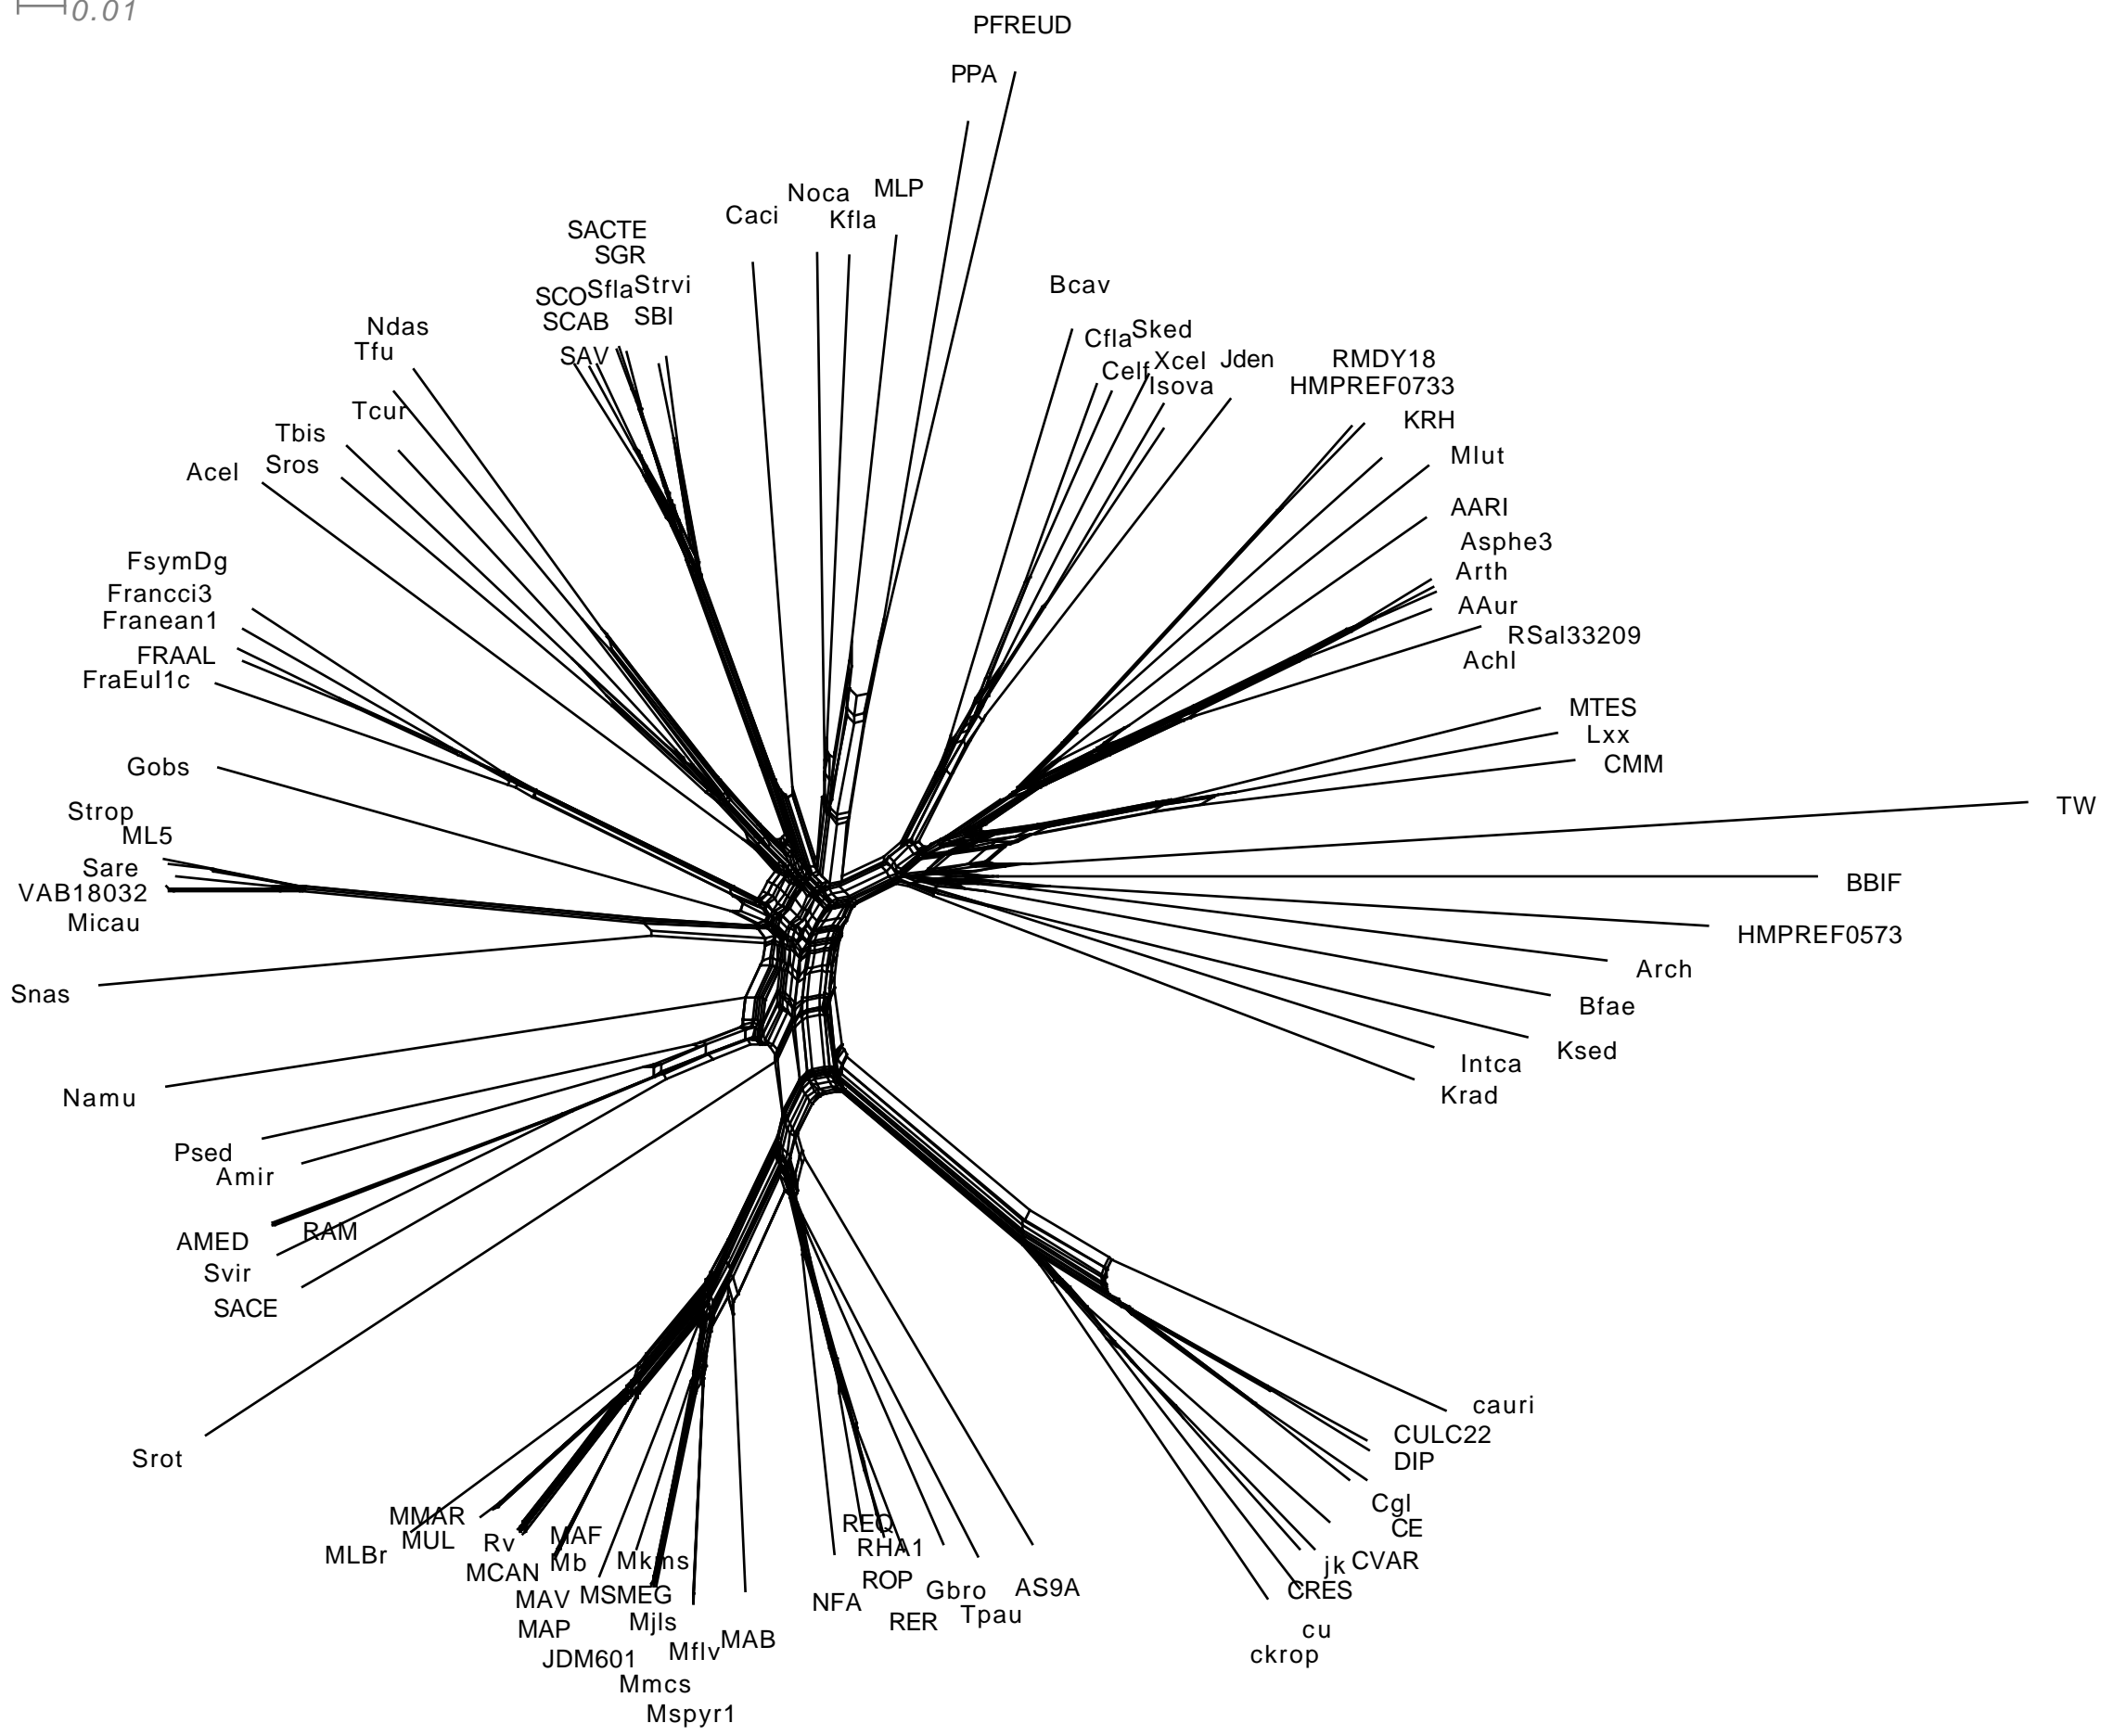

Supplement: 1471-2164-14-611-S2.pdf [file 1471-2164-14-611-S2.pdf]
